# Supplementary material for: Glypican-5 suppresses Epithelial-Mesenchymal Transition of the lung adenocarcinoma by competitively binding to Wnt3a
Source: PubMed Central journal article supplement (PMC5346747; doi:10.18632/oncotarget.12945), 2016-10-27
Supplement: oncotarget-07-79736-s001.pdf [file oncotarget-07-79736-s001.pdf]

## Glypican-5 suppresses Epithelial-Mesenchymal Transition of the lung adenocarcinoma by competitively binding to Wnt3a

### SUPPLEMENTARY TABLES

Supplementary Table S1: The correlation between decreased expression of GPC5 in the LAC (tumor vs. normal) and clinicopathologic factors

| Variables       |             | Number of cases | Decreased expression of GPC5 mRNA in the tumor (vs. normal) | <i>P</i> value |
|-----------------|-------------|-----------------|-------------------------------------------------------------|----------------|
| Sex             | Male        | 67(50.0%)       | -10.56±4.75                                                 | 0.147          |
|                 | Female      | 67(50.0%)       | - 6.95±2.74                                                 |                |
| Age             | <60 years   | 78(58.2%)       | -11.25±4.89                                                 | 0.781          |
|                 | ≥60 years   | 56(41.8%)       | -24.87±3.12                                                 |                |
| Smoking status  | Smoker      | 70(52.2%)       | -10.37±4.31                                                 | 0.391          |
|                 | Non-smoker  | 64(47.8%)       | -7.13±2.11                                                  |                |
| T stage         | T1          | 70(52.2%)       | -6.76±3.82                                                  | 0.490          |
|                 | T2          | 58(43.3%)       | -9.87±5.01                                                  |                |
|                 | T3          | 6 (4.5%)        | -21.25±10.43                                                |                |
| N stage         | N0          | 84(62.7%)       | -6.26±4.20                                                  | 0.021*         |
|                 | N1-2        | 50(37.3%)       | -12.94±7.82                                                 |                |
| pTNM stage      | I           | 73(54.5%)       | -6.12±4.63                                                  | 0.015*         |
|                 | II          | 15(11.2%)       | -9.56±3.35                                                  |                |
|                 | III-IV      | 46(34.3%)       | -12.67±2.64                                                 |                |
| Differentiation | High        | 6(4.5%)         | -0.71±0.20                                                  | 0.001*         |
|                 | High-medium | 11(8.2%)        | -1.11±0.44                                                  |                |
|                 | Medium      | 50(37.3%)       | -6.58±1.83                                                  |                |
|                 | Medium-low  | 41(30.6%)       | -7.85±2.42                                                  |                |
|                 | Low         | 26(19.4%)       | -19.01±2.66                                                 |                |

**Supplementary Table S2: Spearman correlation analysis of relative GPC5 expression and clinicopathologic factors**

| Variables       | Spearman correlation test ( <i>p</i> value)          |
|-----------------|------------------------------------------------------|
|                 | Fold change of GPC5 expression in tumor (vs. normal) |
| T stage         | 0.166(0.056)                                         |
| N stage         | 0.221(0.010*)                                        |
| pTNM stage      | 0.242(0.005*)                                        |
| Differentiation | 0.311(<0.001*)                                       |
| Smoking         | -0.189(0.058)                                        |
